# Supplementary material
Source: PubMed Central journal article supplement (PMC3226368)
Supplement: supp_111.184879_JPET184879_supplementary_data.pdf [file supp_111.184879_JPET184879_supplementary_data.pdf]

## Supplemental Figures and Tables

Identification of chemosensitivity nodes for vinblastine through small interfering RNA high- throughput screens.

Carolyn A. Kitchens, Peter R. McDonald, Tong Ying Shun, Ian F. Pollack and John S. Lazo

The Journal of Pharmacology and Experimental Therapeutics

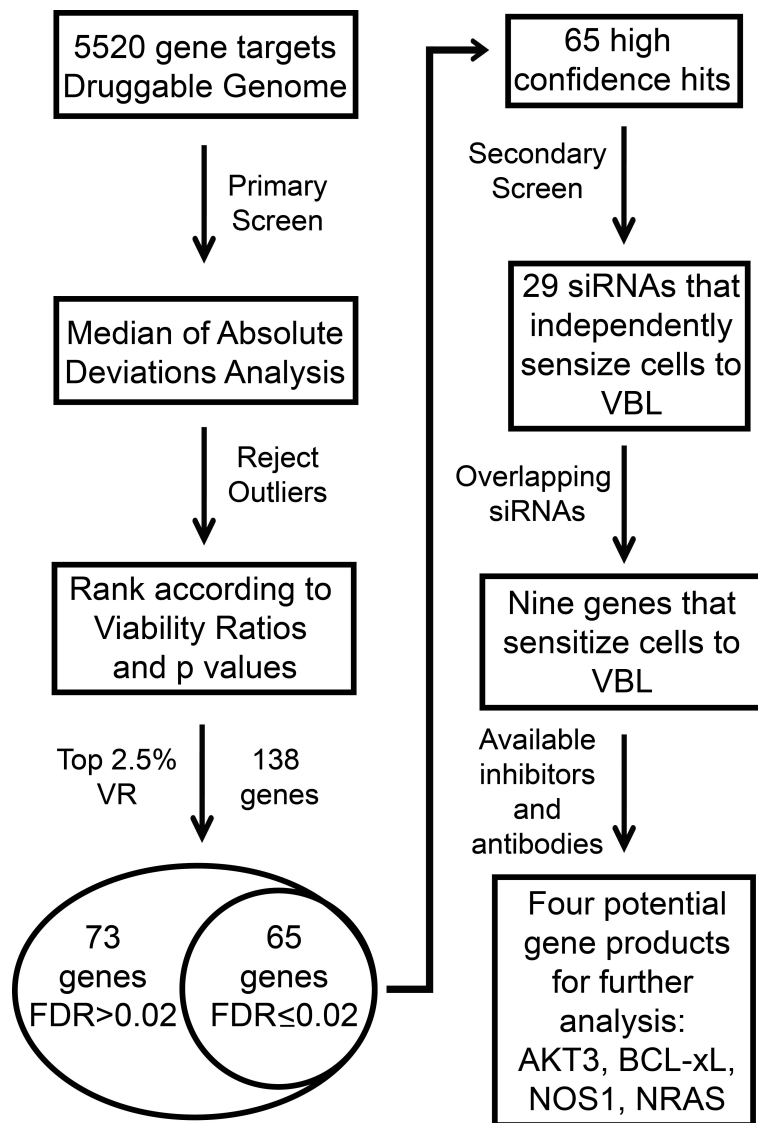

**Supplementary Figure 1. Primary and secondary siRNA HTS overview.** A HTS targeting 5,520 gene products with 16,560 siRNAs was undertaken to identify VBL sensitizers in T98G GBM cells. Outliers from the HTS were determined and rejected by MAD analysis. Genes were ranked according to their viability ratio (VR) and the top 2.5% VRs (138 genes) with  $FDR \leq 0.02$  were selected as hits, resulting in 65 genes that sensitize cells to VBL (1.2% hit rate). Nine of these genes confirmed in a secondary assay, which was limited to gene products with commercially available antibodies and inhibitors, resulting in four gene products (AKT3, BCL-xL, NOS1 and NRAS) as potential targets for novel chemotherapy combinations with VBL.

**Supplementary Table 1.** Viability ratios, p-values and FDRs from the 65 high confidence gene products that sensitized cells to VBL as indicated by the primary siRNA screen.

| <b>Gene Symbol</b> | <b>p-value</b> | <b>FDR</b> | <b>viability ratio</b> | <b>Gene Symbol</b> | <b>p-value</b> | <b>FDR</b> | <b>viability ratio</b> |
|--------------------|----------------|------------|------------------------|--------------------|----------------|------------|------------------------|
| AACS               | 0.002          | 0.004      | 0.451                  | PPIH               | 0.006          | 0.008      | 0.426                  |
| ADSL               | 0.001          | 0.003      | 0.239                  | PRDX1              | <0.001         | 0.001      | 0.486                  |
| AKT3               | 0.001          | 0.004      | 0.280                  | PRDX6              | 0.008          | 0.009      | 0.339                  |
| ANKRD30A           | 0.001          | 0.002      | 0.469                  | PROCR              | 0.002          | 0.004      | 0.179                  |
| BCL-xL             | <0.001         | <0.001     | 0.330                  | PSMC1              | 0.001          | 0.004      | 0.485                  |
| BGLAP              | 0.007          | 0.009      | 0.427                  | PTER               | 0.003          | 0.006      | 0.430                  |
| BTN3A2             | 0.002          | 0.005      | 0.491                  | PXN                | 0.003          | 0.006      | 0.443                  |
| C1GALT2            | 0.005          | 0.007      | 0.351                  | RAB1B              | 0.003          | 0.006      | 0.360                  |
| CDC42              | 0.002          | 0.005      | 0.400                  | RAB21              | 0.004          | 0.006      | 0.457                  |
| CST6               | 0.003          | 0.006      | 0.391                  | RAB9A              | 0.004          | 0.007      | 0.450                  |
| DKFZp434C1418      | 0.001          | 0.003      | 0.471                  | SCARF1             | 0.008          | 0.009      | 0.473                  |
| DKFZp762F0713      | <0.001         | <0.001     | 0.460                  | SCDR10             | <0.001         | 0.002      | 0.416                  |
| DLGAP2             | 0.002          | 0.005      | 0.497                  | SCDR9              | 0.005          | 0.007      | 0.402                  |
| DNASE2             | <0.001         | 0.001      | 0.495                  | SDCCAG10           | 0.006          | 0.008      | 0.491                  |
| DYT1               | <0.001         | <0.001     | 0.397                  | SDHA               | <0.001         | 0.001      | 0.170                  |
| FAH                | <0.001         | 0.001      | 0.464                  | SERPINA10          | <0.001         | 0.002      | 0.386                  |
| FLJ10858           | <0.001         | 0.001      | 0.444                  | SERPINA3           | <0.001         | 0.002      | 0.431                  |
| FTS                | 0.002          | 0.004      | 0.394                  | SERPINB13          | 0.007          | 0.008      | 0.462                  |
| FUK                | 0.007          | 0.008      | 0.434                  | SERPINB3           | 0.001          | 0.002      | 0.322                  |
| GSTA1              | 0.009          | 0.009      | 0.371                  | SERPINB5           | 0.005          | 0.007      | 0.484                  |

| <b>Gene Symbol</b> | <b>p-value</b> | <b>FDR</b> | <b>viability ratio</b> | <b>Gene Symbol</b> | <b>p-value</b> | <b>FDR</b> | <b>viability ratio</b> |
|--------------------|----------------|------------|------------------------|--------------------|----------------|------------|------------------------|
| GSTZ1              | 0.001          | 0.003      | 0.455                  | SEZ6L2             | 0.005          | 0.007      | 0.496                  |
| GYG                | 0.003          | 0.006      | 0.485                  | SPINK1             | 0.001          | 0.002      | 0.411                  |
| GYS1               | 0.006          | 0.007      | 0.460                  | SULF2              | 0.007          | 0.008      | 0.490                  |
| ITPR3              | 0.009          | 0.009      | 0.399                  | TGM3               | 0.001          | 0.003      | 0.483                  |
| KDELR1             | 0.008          | 0.009      | 0.410                  | THEA               | 0.007          | 0.008      | 0.441                  |
| KIF11              | 0.009          | 0.009      | 0.481                  | TNFRSF25           | 0.002          | 0.005      | 0.475                  |
| LOC136242          | 0.006          | 0.008      | 0.456                  | TPRA40             | <0.001         | 0.001      | 0.450                  |
| LOC200895          | 0.002          | 0.005      | 0.438                  | UGT1A9             | 0.002          | 0.005      | 0.498                  |
| NIT1               | <0.001         | 0.001      | 0.402                  | UGT2B11            | 0.002          | 0.005      | 0.440                  |
| NOS1               | <0.001         | 0.003      | 0.483                  | UGT2B17            | 0.001          | 0.003      | 0.496                  |
| NRAS               | 0.001          | 0.003      | 0.389                  | UMPS               | 0.001          | 0.004      | 0.380                  |
| PMM2               | 0.005          | 0.007      | 0.397                  | WARS2              | 0.003          | 0.006      | 0.479                  |
| POLR1A             | 0.001          | 0.004      | 0.497                  |                    |                |            |                        |

A.

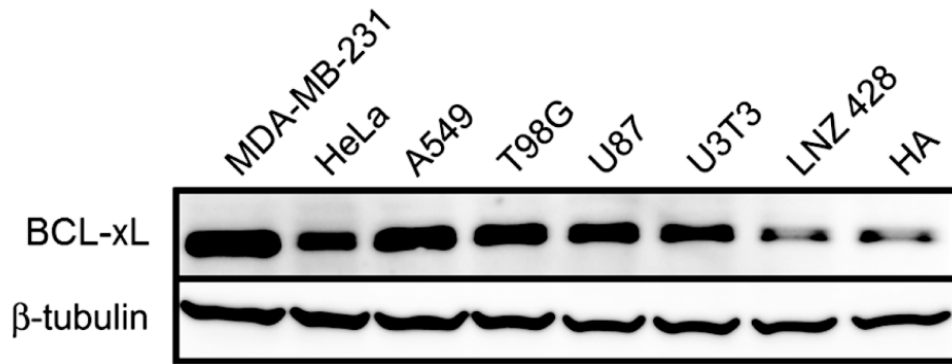

B.

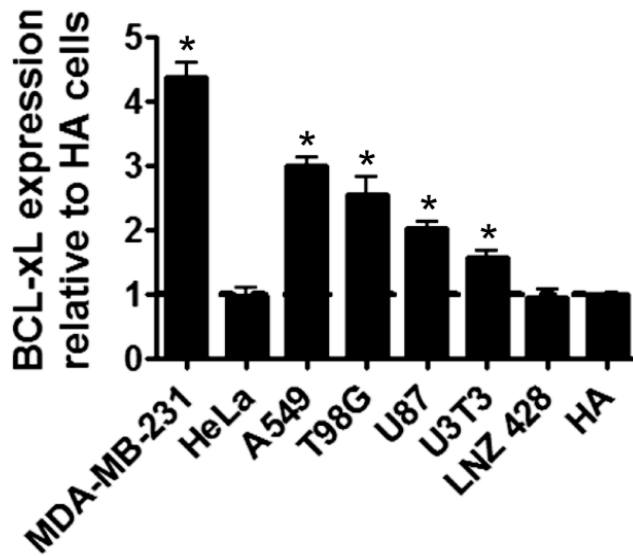

**Supplementary Figure 2. Overexpression of BCL-xL in human cancer cells.** (A) BCL-xL protein expression was measured by Western blot analysis in various cancer cells including (from left to right) MDA-MB 231 (breast cancer), HeLa (cervical cancer), A549 (non-small cell lung cancer), T98G, U87, U3T3, LNZ 428 (glioblastoma), and HA (human astrocytes). Expression levels were normalized to a  $\beta$ -tubulin loading control. (B) Protein expression levels were quantified by densitometry normalized to the tubulin control and then normalized to the relative expression levels of HA cells. Blot representative of three replicates. Bars equal S.E.M.

\* $p \leq 0.05$

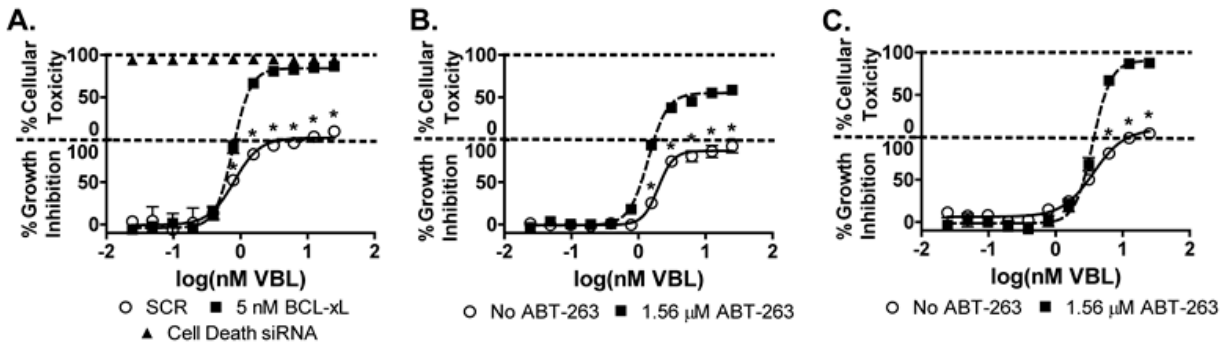

**Supplemental Figure 3. Concentration dependent cytotoxicity of VBL with BCL-xL siRNA or ABT-263.** We conducted growth inhibition studies comparing the cell viability (CV) at 48 and 96 h after VBL addition using National Cancer Institute growth inhibition methodology, where growth inhibition equals  $(1-CV_{96\text{ h}})/(1-CV_{48\text{ h}})$ . Reduction in CV<sub>96 h</sub> greater than the DMSO CV at 48 h was defined as cytotoxicity. (A) T98G cells transfected with scrambled (SCR), 5 nM BCL-xL or “Cell Death” siRNA, were treated with increasing VBL concentrations. We found  $\geq 1.56$  nM VBL caused a cytostatic effect (100% growth inhibition). In the presence of 5 nM BCL-xL siRNA, there was an additional loss of cell viability, where 100% cellular toxicity was complete lethality. “Cell Death” siRNA was completely lethal in the cells. (B) T98G and (C) A549 cells were treated with increasing VBL concentrations in the presence and absence of 1.56  $\mu$ M ABT-263. The antimitotic VBL arrested cell growth but the addition of ABT-263 with ABT-263 in T98G and A549 cells resulted in the loss of cell viability consist with cytotoxicity. Each value is the mean of three independent experiments. (○) Cells treated with increasing VBL concentrations. (■) Cells treated with increasing VBL concentrations in the presence of nontoxic BCL-xL siRNA or ABT-263. (▲) T98G cells transfected with “Cell Death” negative control siRNA. Each value is the mean of three independent experiments. Bars equal S.E.M. \* $p \leq 0.05$

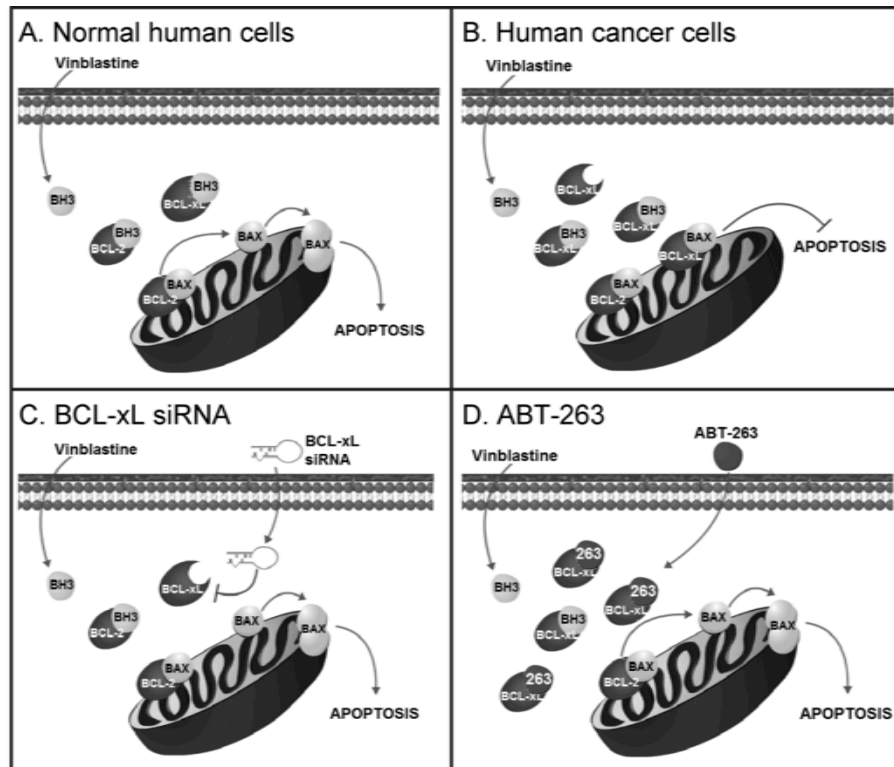

**Supplementary Figure 4. Resensitization of cancer cells to VBL by BCL-xL siRNA and ABT-263.** (A) Normal human cells have a balance of BCL-2 pro-survival and pro-apoptotic proteins. Upon activation of intrinsic apoptosis, BH3 only proteins compete with BCL-2 pro-apoptotic for binding to the BCL-2 pro-survival proteins (BCL-2, BCL-xL and BCL-w). The pro-apoptotic proteins are then free to translocate to the mitochondria and activate apoptosis. (B) In certain cancer cells, the BCL-2 pro-survival proteins are overexpressed and the balance of pro-survival to pro-apoptotic proteins is disrupted. Upon activation of intrinsic apoptosis by anticancer agents, the overexpressed pro-survival proteins are able to bind the BH3 only proteins, while still suppressing the pro-apoptotic proteins, preventing apoptosis even in the presence of chemotherapy. (C) siRNAs targeting pro-survival proteins decrease the expression of the pro-survival proteins, thereby reestablishing the balance between pro-survival and pro-apoptotic proteins and resensitizing cancer cells to chemotherapeutic agents. (D) BH3 mimetics, such as ABT-263, bind to the overexpressed pro-survival proteins and resensitize cells to other anticancer agents.

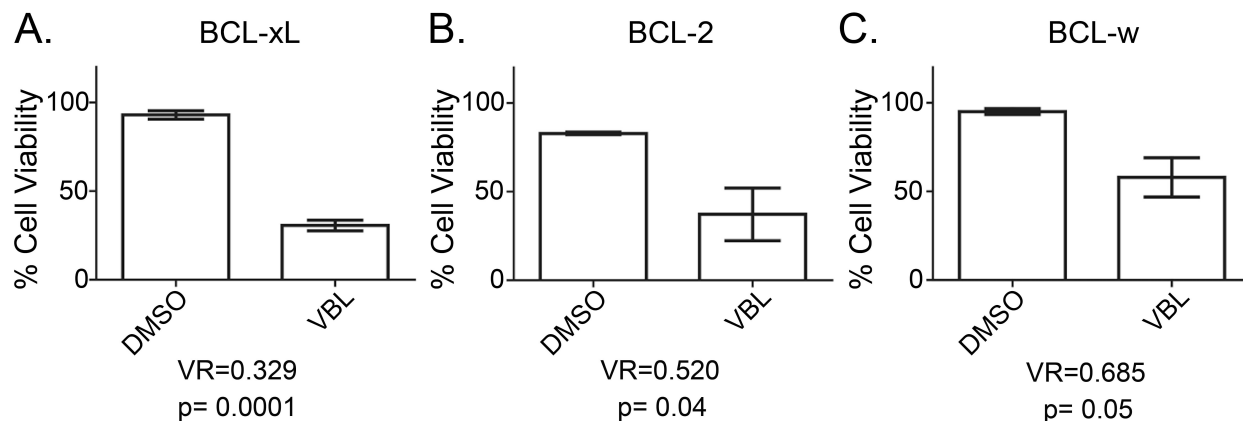

**Supplementary Figure 5. Less stringent statistical criteria from the primary HTS includes BCL-2 and BCL-w as sensitizers of GBM to VBL.** By decreasing the stringency of the siRNA primary screen, all three BCL-2 prosurvival proteins inhibited by ABT-263 would have been identified as sensitizers to VBL. (A) BCL-xL was originally identified as a high confidence VBL sensitizer with a  $p \leq 0.01$  and a viability ratio in the top 2.5%. While (B) BCL-2 and (C) BCL-w also had viability ratios in the top 2.5%, they both had  $p \leq 0.05$  but  $p > 0.01$ , which eliminated them as high confidence gene products in from the primary siRNA HTS. If the initial Student's t-test had an  $\alpha$  of 0.05 versus 0.01, all three prosurvival proteins would have been identified as high confidence VBL sensitizers from the primary screen.



**Supplementary Table 2.** siRNA sequences for BCL-xL in secondary analyses.

| <b>siRNA name</b> | <b>siRNA ID</b> | <b>sense</b>          | <b>antisense</b>       |
|-------------------|-----------------|-----------------------|------------------------|
| BCL-xL<br>"A"     | s1920           | AUACUUUUGUGGAACUCUATT | UAGAGUUCCACAAAAGUAUCC  |
| BCL-xL<br>"B"     | s1921           | GCUGGAGUCAGUUUAGUGATT | UCACUAAACUGACUCCAGCTG  |
| BCL-xL<br>"C"     | s1922           | GGAACUCUAUGGGAACAAUTT | AUUGUUCCTCAUAGAGUUCCAC |
